# Supplementary material for: In vitro prediction of the efficacy of molecularly targeted cancer therapy by Raman spectral imaging
Source: PubMed Central journal article supplement (PMC4604500; doi:10.1007/s00216-015-8875-z), 2015-07-14
Supplement: 216_2015_8875_MOESM1_ESM.pdf [file 216_2015_8875_MOESM1_ESM.pdf]

## **Analytical and Bioanalytical Chemistry**

### **Electronic Supplementary Material**

#### **In vitro prediction of the efficacy of molecularly targeted cancer therapy by Raman spectral imaging**

Hesham K. Yosef, Laven Mavarani, Abdelouahid Maghnouj, Stephan Hahn,  
Samir F. El-Mashtoly, Klaus Gerwert

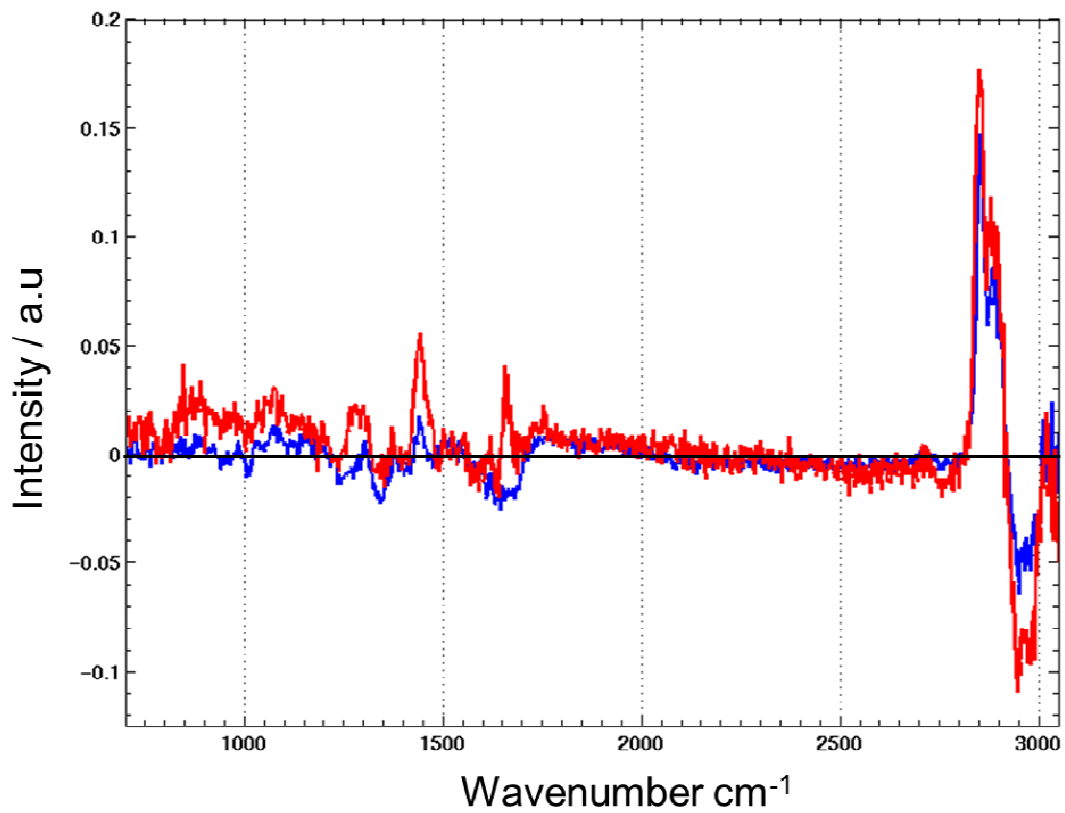

**Fig. S1** Plot of paired loadings resulting from the principle component analysis of the membrane mean spectra of both control cells (red) and erlotinib-treated cells (blue)

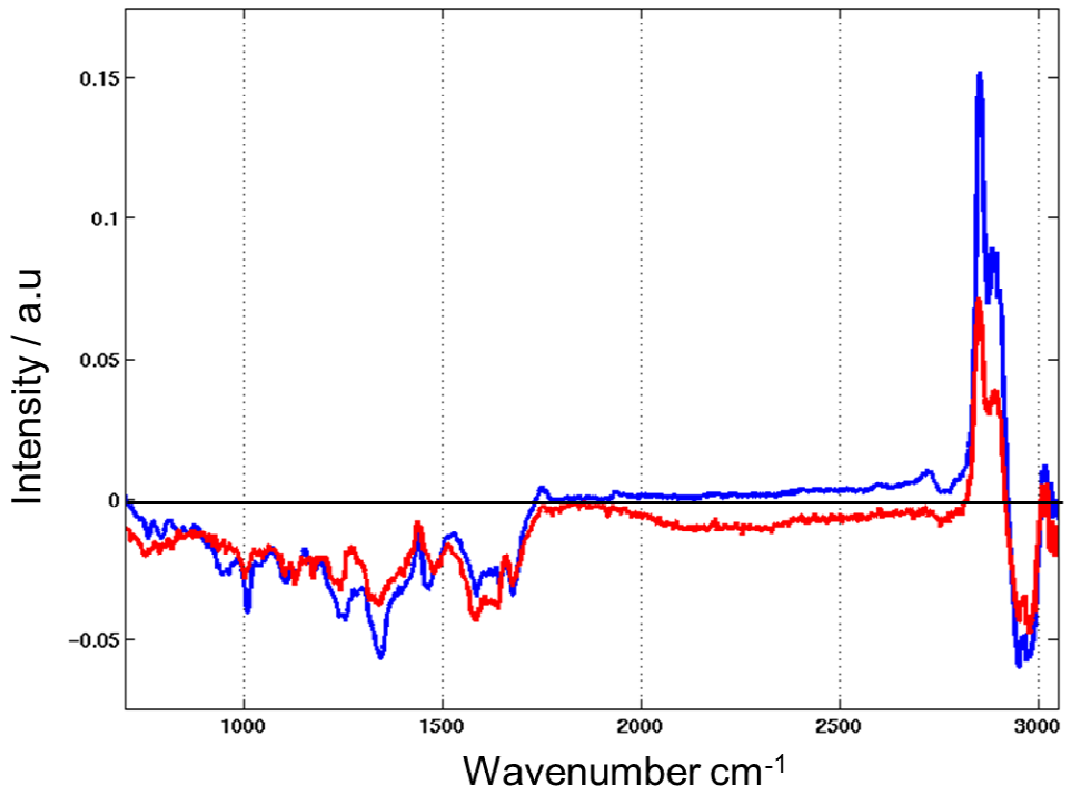

**Fig. S2** Plot of paired loadings resulting from the principle component analysis of the cytoplasm mean spectra of both control cells (red) and erlotinib-treated cells (blue)

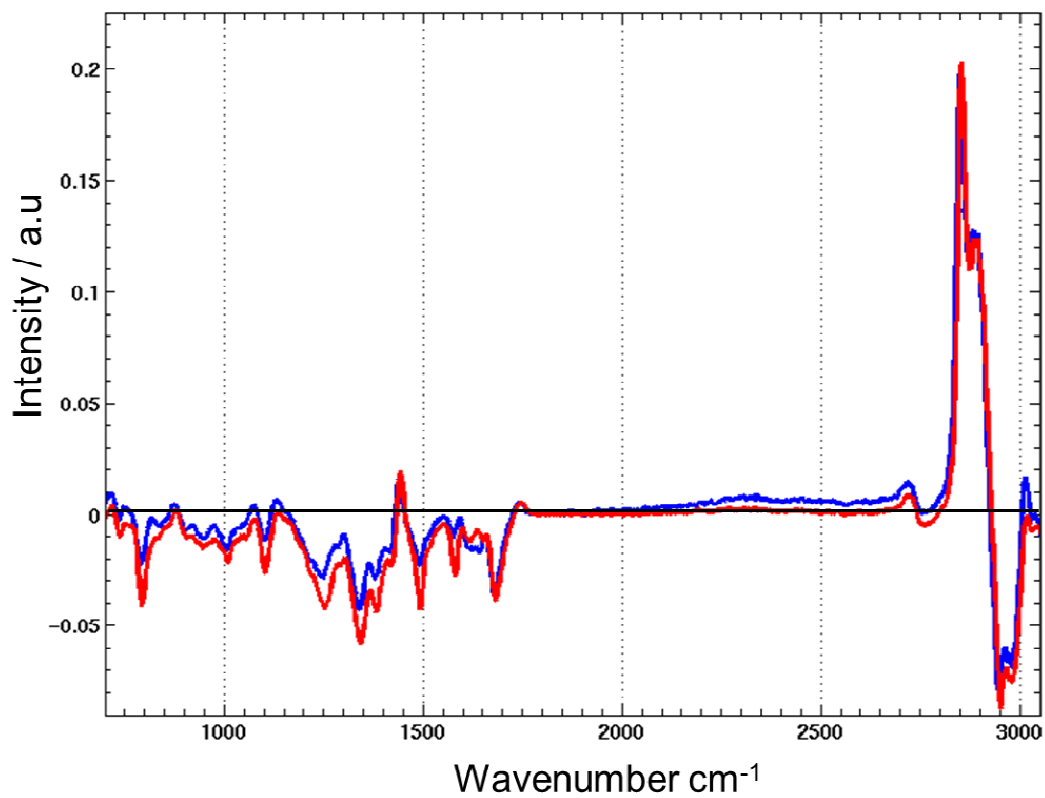

**Fig. S3** Plot of paired loadings resulting from the principle component analysis of the nucleus mean spectra of both control cells (red) and erlotinib-treated cells (blue)

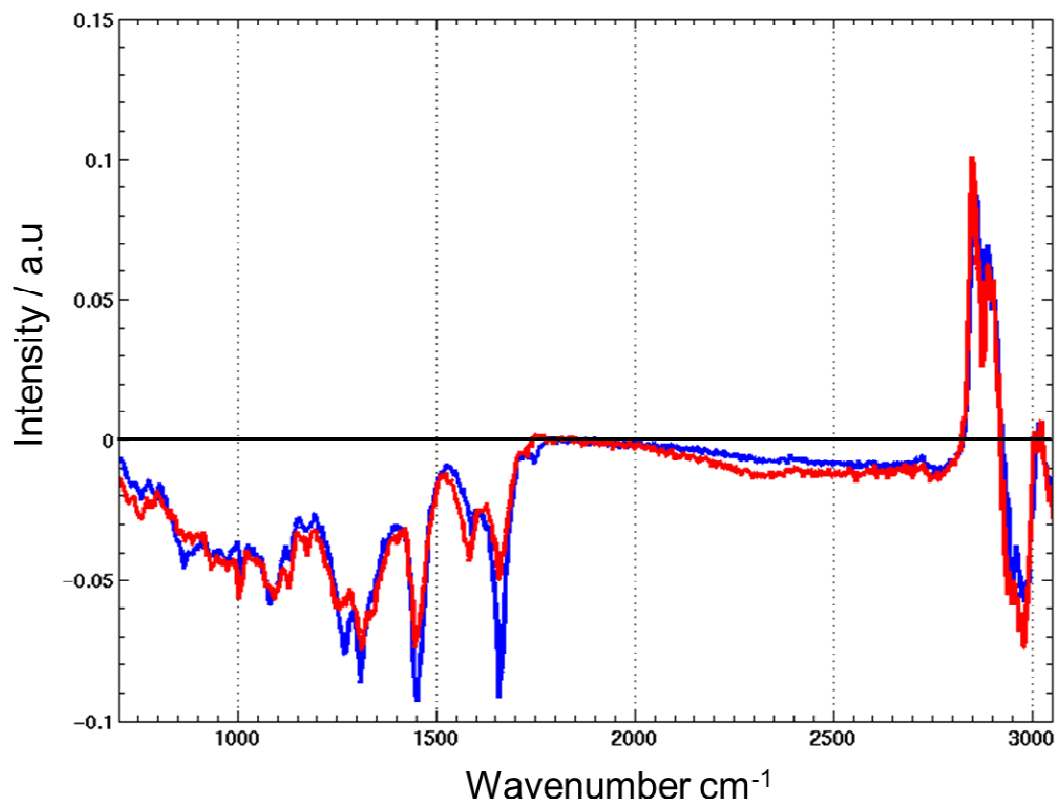

**Fig. S4** Plot of paired loadings resulting from the principle component analysis of the lipid droplets mean spectra of both control cells (red) and erlotinib-treated cells (blue)
